# Supplementary material for: Enantioselective hydrogenation of α-ketoesters over alkaloid-modified platinum nanowires
Source: Royal Society of Chemistry journal article supplement (doi:10.1039/c1gc15606c), 2011-01-01
Supplement: c1gc15606c.pdf [file c1gc15606c.pdf]

## Supporting Information

### Enantioselective Hydrogenation of $\alpha$ -Ketoesters Over Alkaloid-Modified Platinum Nanowires\*\*

Nandanan Erathodiyil,<sup>‡</sup> Hongwei Gu,<sup>‡,†</sup> Huilin Shao, Jiang Jiang and Jackie Y. Ying\*

*Institute of Bioengineering and Nanotechnology, 31 Biopolis Way, The Nanos, Singapore 138669.*

*E-mail: jyying@ibn.a-star.edu.sg; Fax: (+65) 6478-9020*

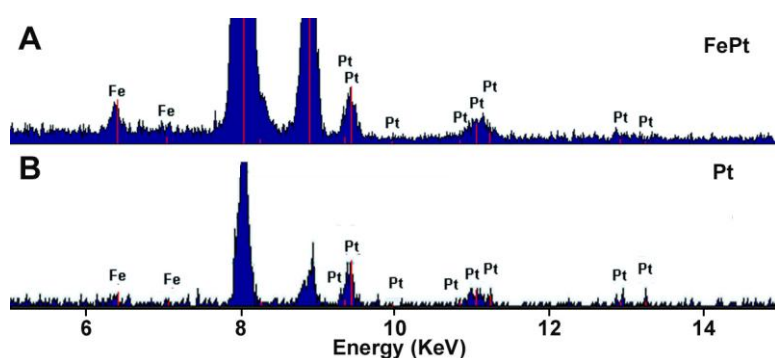

**Fig. S1** EDX analyses of (A) FePt and (B) Pt nanowires with Fe/Pt weight ratios of (A) 52:48 and (B) 5:95.

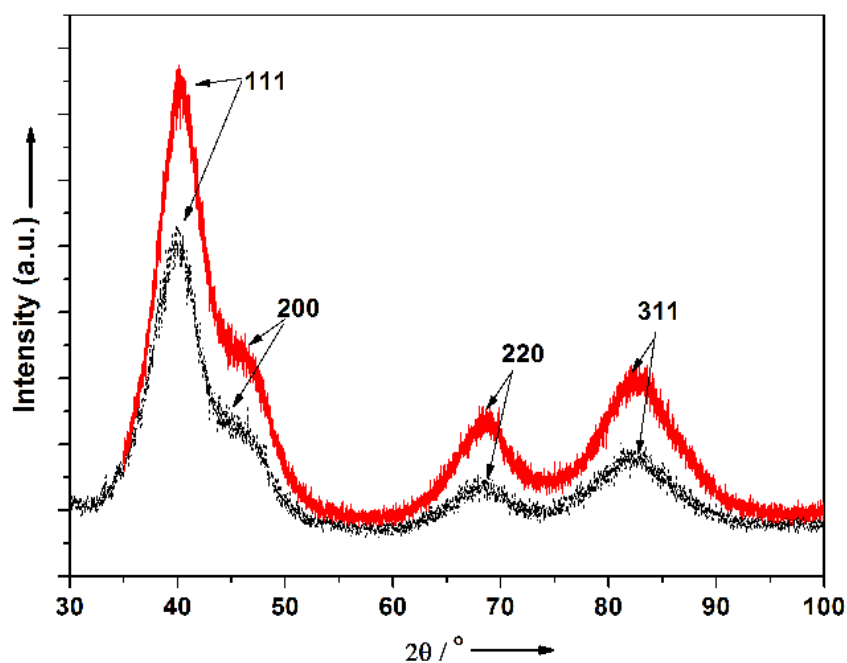

**Fig. S2** XRD patterns of the as-synthesized (—) FePt and (---) Pt nanowires.

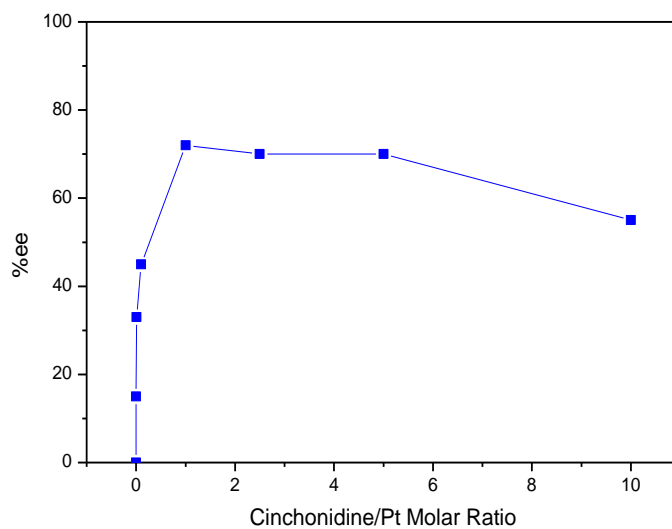

**Fig. S3** Effect of alkaloid/Pt molar ratio on the enantioselectivity of asymmetric hydrogenation of ethyl pyruvate in water and acetic acid at 25°C over 1 mol% of Pt nanowires.

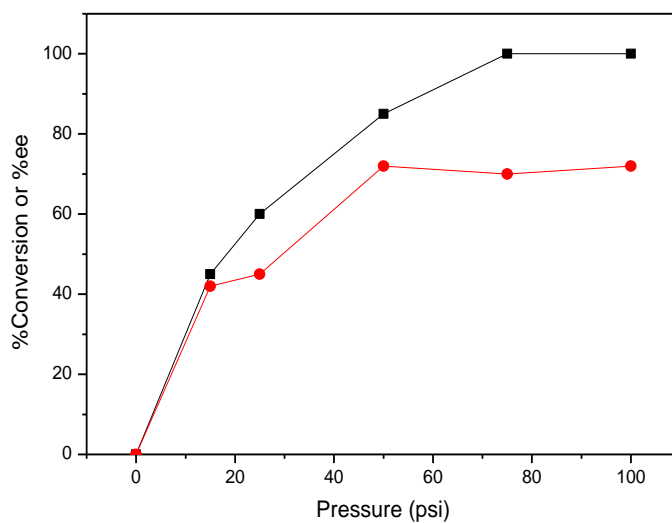

**Fig. S4** Effect of pressure on the (■) conversion and (●) ee of asymmetric hydrogenation of ethyl pyruvate in water and acetic acid at 25°C over 1 mol% of Pt nanowires.

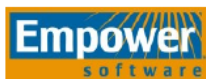

## Default Individual Report

Reported by User: System

Project Name: NandanPFUcatalyst

### SAMPLE INFORMATION

|                   |              |                     |                           |
|-------------------|--------------|---------------------|---------------------------|
| Sample Name:      | 5NEBF-Rac    | Acquired By:        | System                    |
| Sample Type:      | Unknown      | Date Acquired:      | 6/10/2009 11:09:49 AM     |
| Vial:             | 1            | Acq. Method Set:    |                           |
| Injection #:      | 1            | Date Processed:     | 6/12/2009 9:27:54 AM      |
| Injection Volume: | 10.00 ul     | Processing Method:  | Default                   |
| Run Time:         | 60.0 Minutes | Channel Name:       | W2996 215.0nm-1.2         |
| Sample Set Name:  | June102009   | Proc. Chnl. Descr.: | W2996 PDA 215.0 nm at 1.2 |

### Auto-Scaled Chromatogram

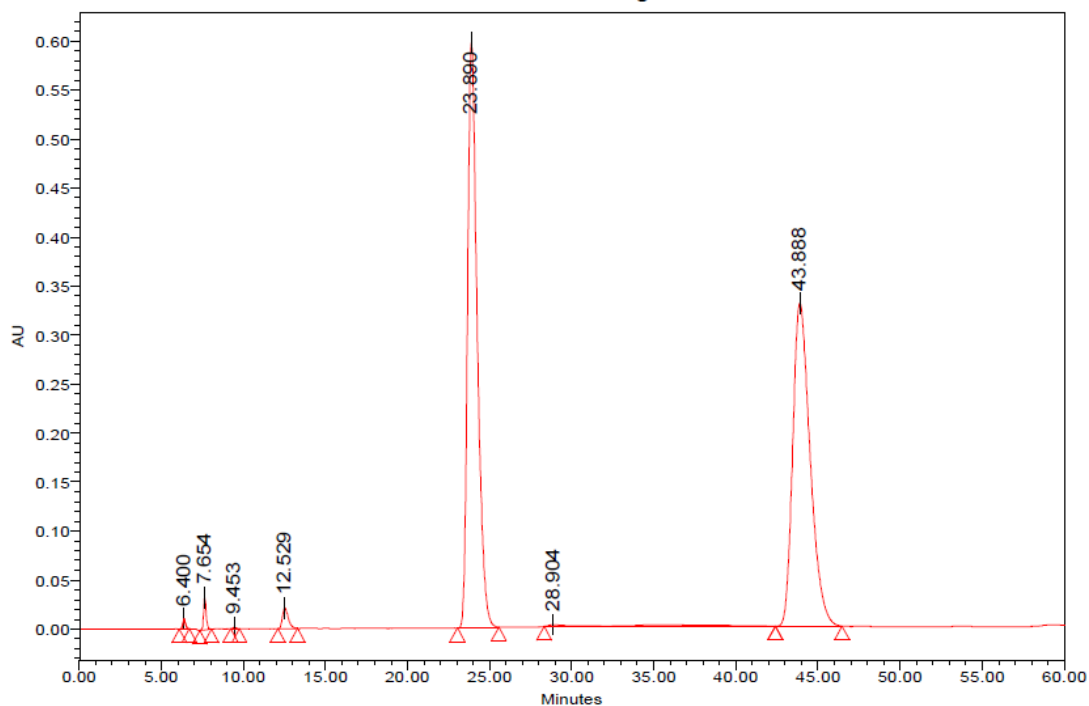

SampleName 5NEBF-Rac; Vial 1; Injection 1; Channel W2996 215.0nm-1.2; Date Acquired 6/10/2009 11:09:49 AM

|   | RT     | Area     | % Area |
|---|--------|----------|--------|
| 1 | 23.890 | 24420064 | 48.32  |
| 2 | 43.888 | 24328067 | 48.14  |

Fig. S5 HPLC profile of racemic ethyl mandelate.

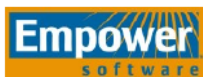

## Default Individual Report

Reported by User: System

Project Name: NandanPFUcatalyst

### SAMPLE INFORMATION

|                   |              |                     |                           |
|-------------------|--------------|---------------------|---------------------------|
| Sample Name:      | 5NEBF-Rn1    | Acquired By:        | System                    |
| Sample Type:      | Unknown      | Date Acquired:      | 6/10/2009 2:12:18 PM      |
| Vial:             | 4            | Acq. Method Set:    |                           |
| Injection #:      | 1            | Date Processed:     | 6/12/2009 9:28:12 AM      |
| Injection Volume: | 10.00 ul     | Processing Method:  | Default                   |
| Run Time:         | 60.0 Minutes | Channel Name:       | W2996 215.0nm-1.2         |
| Sample Set Name:  | June102009   | Proc. Chnl. Descr.: | W2996 PDA 215.0 nm at 1.2 |

### Auto-Scaled Chromatogram

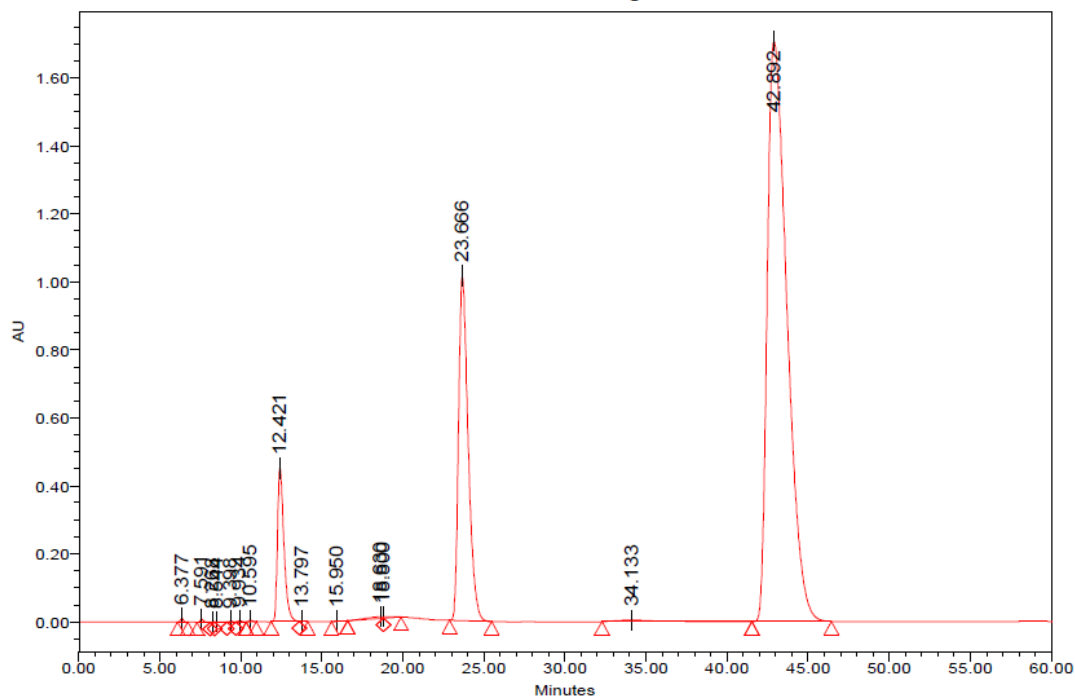

— SampleName 5NEBF-Rn1; Vial 4; Injection 1; Channel W2996 215.0nm-1.2; Date Acquired 6/10/2009 2:12:18 PM

|   | RT     | Area      | % Area |
|---|--------|-----------|--------|
| 1 | 23.666 | 41752840  | 20.87  |
| 2 | 42.892 | 143948801 | 71.94  |

**Fig. S6** HPLC profile of hydrogenation of ethylbenzoyl formate in the presence of cinchonidine.

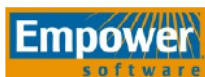

## Default Individual Report

Reported by User: System

Project Name: NandanPFUcatalyst

### SAMPLE INFORMATION

|                   |              |                     |                           |
|-------------------|--------------|---------------------|---------------------------|
| Sample Name:      | 5NEBF-Rn2    | Acquired By:        | System                    |
| Sample Type:      | Unknown      | Date Acquired:      | 6/10/2009 3:13:08 PM      |
| Vial:             | 5            | Acq. Method Set:    |                           |
| Injection #:      | 1            | Date Processed:     | 6/12/2009 9:28:17 AM      |
| Injection Volume: | 10.00 ul     | Processing Method:  | Default                   |
| Run Time:         | 60.0 Minutes | Channel Name:       | W2996 215.0nm-1.2         |
| Sample Set Name:  | June102009   | Proc. Chnl. Descr.: | W2996 PDA 215.0 nm at 1.2 |

### Auto-Scaled Chromatogram

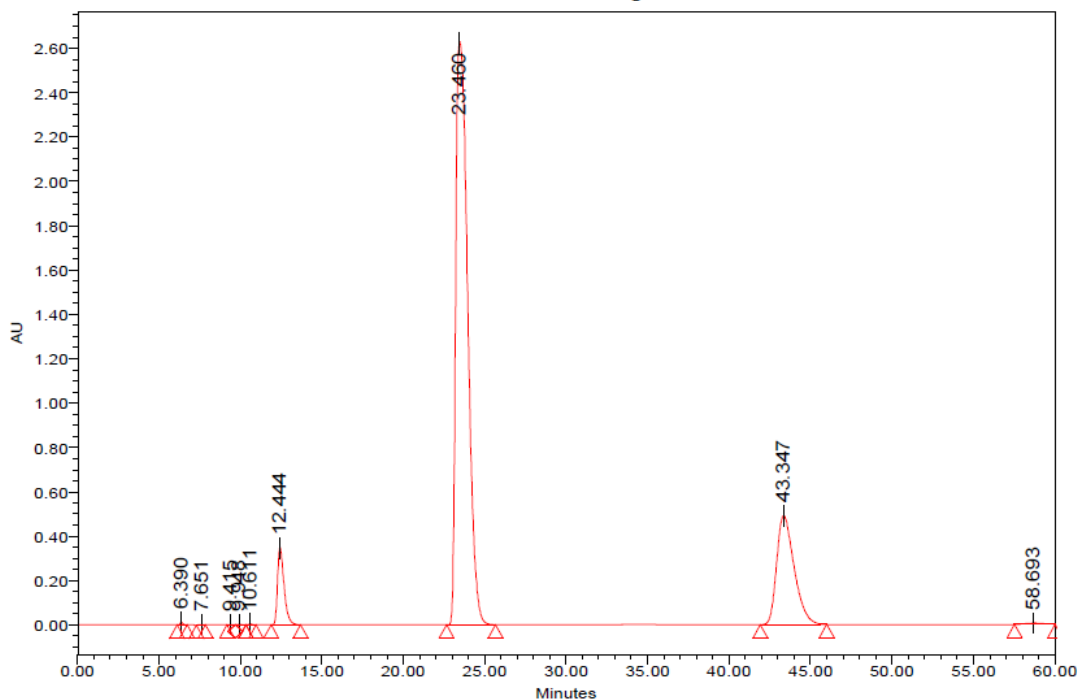

SampleName 5NEBF-Rn2; Vial 5; Injection 1; Channel W2996 215.0nm-1.2; Date Acquired 6/10/2009 3:13:08 PM

|   | RT     | Area      | % Area |
|---|--------|-----------|--------|
| 1 | 23.460 | 133194379 | 73.98  |
| 2 | 43.347 | 36587800  | 20.32  |

**Fig. S7** HPLC profile of hydrogenation of ethylbenzoyl formate in the presence of cinchonine.

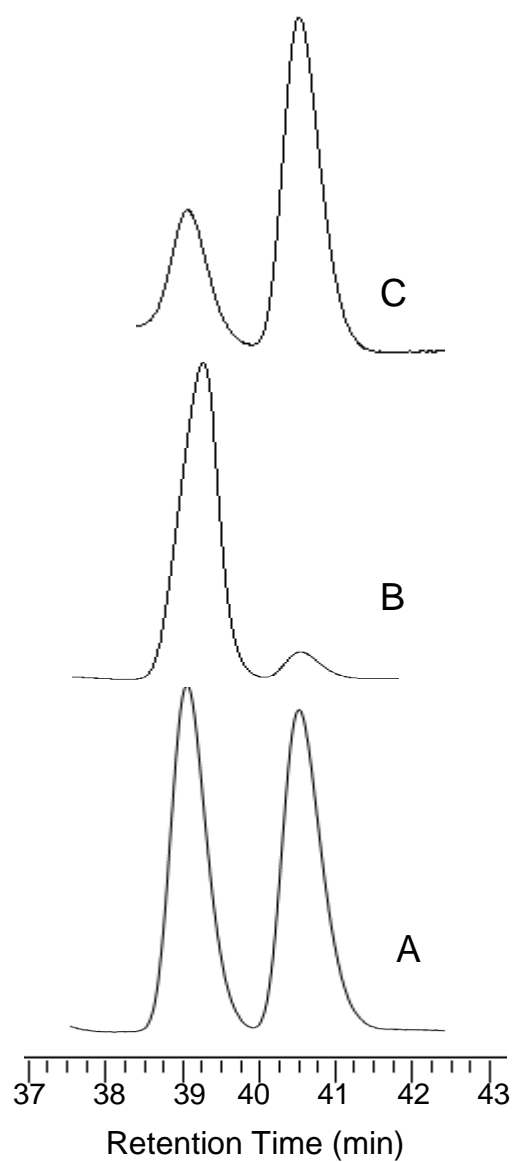

**Fig. S8** HPLC profiles of the products of asymmetric hydrogenation of ethyl pyruvate: (A) racemic ethyl lactate, (B) *R*-ethyl lactate, and (C) *S*-ethyl lactate.
